# Supplementary material for: Distinct response of the hepatic transcriptome to Aflatoxin B1 induced hepatocellular carcinogenesis and resistance in rats
Source: PubMed Central journal article supplement (PMC4992951; doi:10.1038/srep31898), 2016-08-22
Supplement: srep31898-s1.pdf [file srep31898-s1.pdf]

# Distinct response of the hepatic transcriptome to Aflatoxin B<sub>1</sub> induced hepatocellular carcinogenesis and resistance in rats

Jiejun Shi<sup>1,2,+</sup>, Jiangtu He<sup>1,+</sup>, Jing Lin<sup>2</sup>, Xin Sun<sup>2</sup>, Fenyong Sun<sup>1,\*</sup>, Chao Ou<sup>3,\*</sup>, Cizhong Jiang<sup>1,2,\*</sup>

<sup>1</sup> Department of Clinical Laboratory Medicine, Shanghai Tenth People's Hospital of Tongji University, Shanghai, China

<sup>2</sup> Shanghai Key Laboratory of Signaling and Disease Research, the School of Life Sciences and Technology, Tongji University, Shanghai, China

<sup>3</sup> Department of Clinical Laboratory, the Affiliated Tumor Hospital of Guangxi Medical University, Nanning, Guangxi Province, China

**\* Corresponding author**

[sunfenyong@126.com](mailto:sunfenyong@126.com) (F.S.), [chaouu\\_gxmu@163.com](mailto:chaouu_gxmu@163.com) (C.O.), or [czjiang@tongji.edu.cn](mailto:czjiang@tongji.edu.cn) (C.J.)

<sup>+</sup>These authors contributed equally to this work.

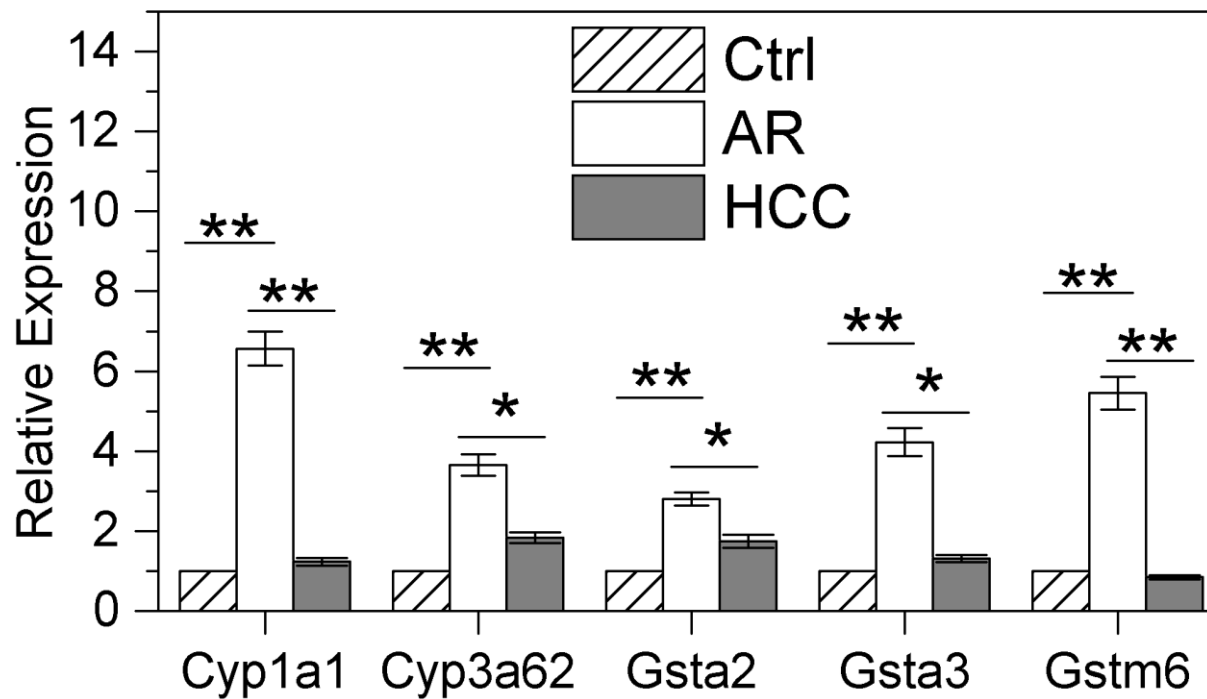

**Supplementary Figure S1.** qPCR results of AFB1 metabolism related genes.

qPCR results confirm significantly increased expression level of AFB1 metabolism related genes in the AR sample (\* p-value < 0.05, \*\* p-value < 0.01, Student's t-test).

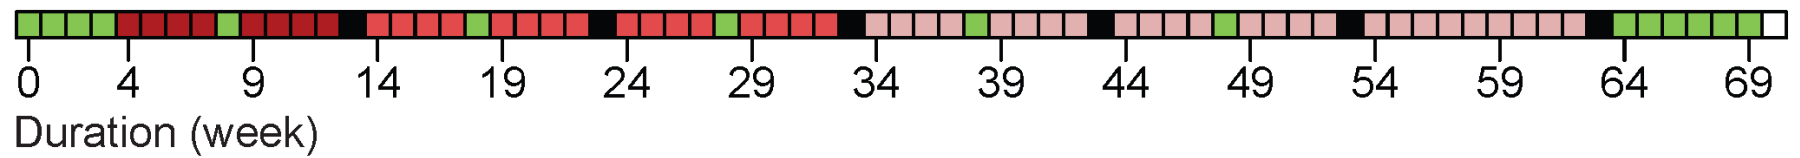

- Control diet(CD) only
- AFB<sub>1</sub>(200 µg/kg body weight, 3 times/week) + CD
- AFB<sub>1</sub>(100 µg/kg body weight, twice/week) + CD
- AFB<sub>1</sub>(100 µg/kg body weight, once/week) + CD
- Liver biopsy for HCC examination + CD
- All rats were sacrificed for sample collection.

Supplementary Figure S2. AFB<sub>1</sub> exposure strategy.

**Supplementary Table S1.** RNA-seq read count and alignment summary.

| Samples                        | Hepatocellular carcinoma |     |            |     | AFB <sub>1</sub> resistance |     |            |     | Control    |     |            |     |
|--------------------------------|--------------------------|-----|------------|-----|-----------------------------|-----|------------|-----|------------|-----|------------|-----|
|                                | R1 reads                 |     | R2 reads   |     | R1 reads                    |     | R2 reads   |     | R1 reads   |     | R2 reads   |     |
|                                | Count                    | %   | Count      | %   | Count                       | %   | Count      | %   | Count      | %   | Count      | %   |
| Total reads                    | 29,767,084               | 100 | 29,767,084 | 100 | 33,333,334                  | 100 | 33,333,334 | 100 | 33,333,334 | 100 | 33,333,334 | 100 |
| Total mapped reads             | 26,983,873               | 91  | 26,995,184 | 91  | 30,392,438                  | 91  | 30,410,670 | 91  | 30,144,262 | 90  | 30,134,074 | 90  |
| Mapped concordant paired reads | 26,022,103               | 87  | 26,022,103 | 87  | 29,424,474                  | 88  | 29,424,474 | 88  | 28,993,816 | 87  | 28,993,816 | 87  |

**Supplementary Table S2.** Primers used for qPCR.

| <b>Gene</b> | <b>Forward primer</b>        | <b>Reverse primer</b>       |
|-------------|------------------------------|-----------------------------|
| Bcl2        | 5'-cagagatgtccagtcagctg-3'   | 5'-cagtcatccacagagcgatg-3'  |
| MYO18A      | 5'-caagctcagctcgaagagtc-3'   | 5'-actggccatgctctccagac-3'  |
| Nfkb1       | 5'-cagctgacagaagacacgag-3'   | 5'-tctgtgtagcccatctgtcg-3'  |
| Mapk8       | 5'-gaagacagccatgagtgtg-3'    | 5'-ctgggtacctactcactggt-3'  |
| Casp1       | 5'-tgtctcatggctccaggag-3'    | 5'-ttctctccacggcatgcctg-3'  |
| Casp4       | 5'-gggttaatgtctcatggcac-3'   | 5'-gcaggcctgcacaatgatgac-3' |
| Il4         | 5'-gacagccctctgagagagatc-3'  | 5'-ccgtggtgttcctgttgcc-3'   |
| Mpo         | 5'-agagctcaagcgctgaatc-3'    | 5'-ctgagtcattgtaggatcgg-3'  |
| Bnip3       | 5'-cgtctgacaactccactag-3'    | 5'-cactaaatcaggaacaccgc-3'  |
| Sstr3       | 5'-ttcaggtcagctacctagtc-3'   | 5'-tgctgcaaactgagcttagc-3'  |
| Cyp1a1      | 5'-caacaggtcatgctaggatc-3'   | 5'-ggctttgcaaggacaaggag-3'  |
| Cyp3a62     | 5'-actgatgtggagattgtggc-3'   | 5'-caggacatcataggtcacag-3'  |
| Gsta2       | 5'-aaggacatgaaggagagagc-3'   | 5'-acaaggtagtcttgccatg-3'   |
| Gsta3       | 5'-gttggcaacaagctgagcag-3'   | 5'-ttgctgactctggttctcag-3'  |
| Gstm6       | 5'-cagtggtgctgatgacaaattc-3' | 5'-atgtccacacgaatcctctc-3'  |
